# Supplementary material for: Facile synthesis, pharmacokinetic and systemic clearance evaluation, and positron emission tomography cancer imaging of64Cu–Au alloy nanoclusters
Source: Royal Society of Chemistry journal article supplement (doi:10.1039/c4nr04569f), 2014-01-01
Supplement: c4nr04569f1.pdf [file c4nr04569f1.pdf]

Supporting Information for

**Facile Synthesis, Pharmacokinetic and Systemic Clearance  
Evaluation, and Positron Emission Tomography Cancer Imaging of  
<sup>64</sup>Cu-Au Alloy Nanoclusters**

Yongfeng Zhao, Deborah Sultan, Lisa Detering, Hannah Luehmann, and Yongjian Liu\*

[\*] Prof. Y. Liu, Dr. Y. Zhao, D. Sultan, L. Detering, H. Luehmann

Mallinckrodt Institute of Radiology, Washington University School of Medicine, St. Louis,  
Missouri, 63110, United States

Email: [liuyo@mir.wustl.edu](mailto:liuyo@mir.wustl.edu)

This work was supported in part by a start-up fund from Mallinckrodt Institute of Radiology,  
Washington University.

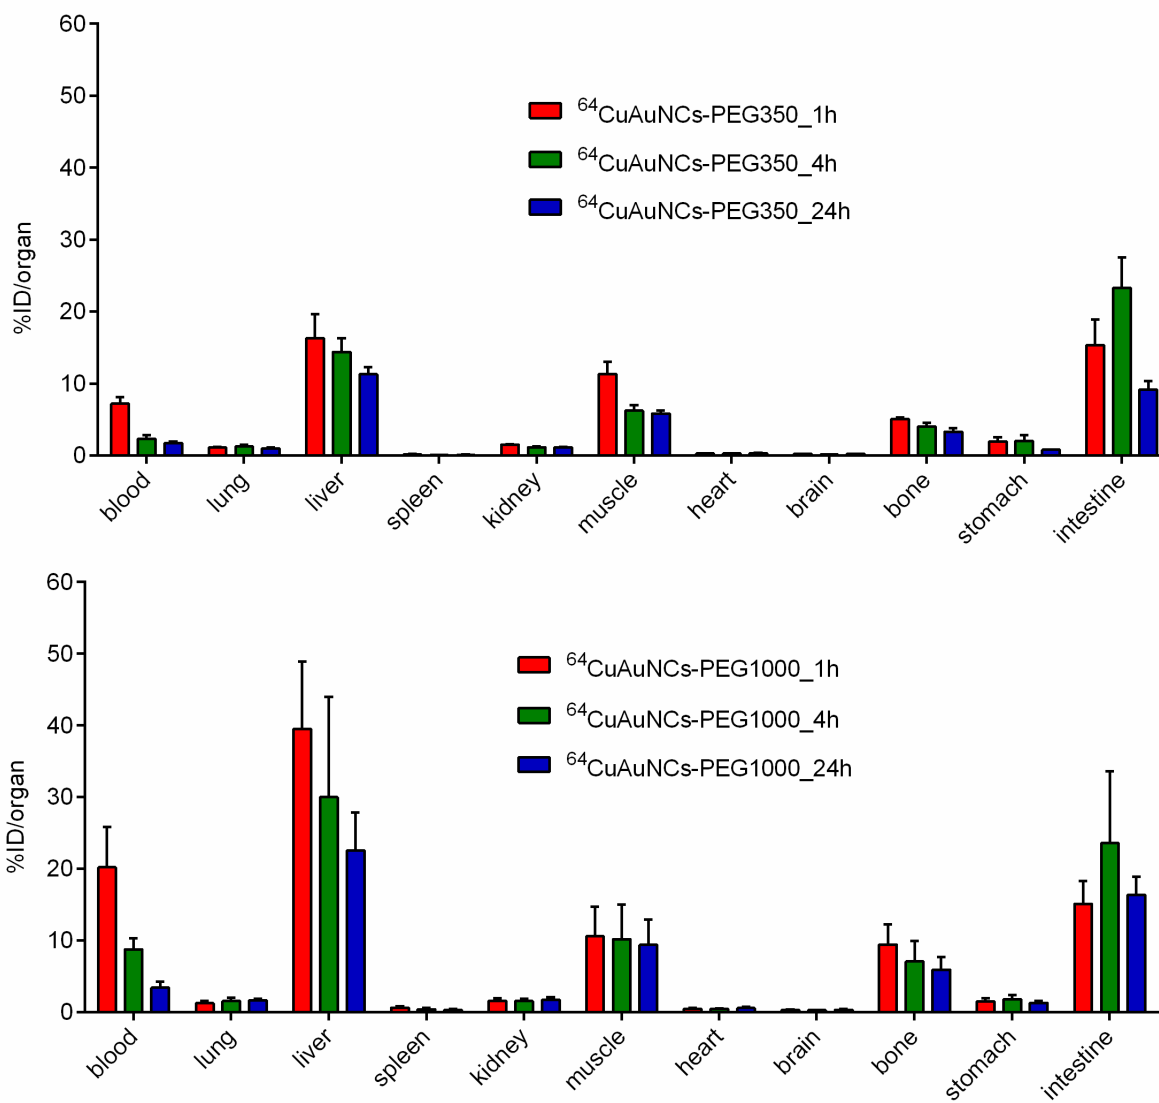

**Figure S1.** Biodistribution of a)  $^{64}\text{CuAuNCs-PEG350}$  and b)  $^{64}\text{CuAuNCs-PEG1000}$  in wild-type C57BL/6 male mice at 1 h, 4 h, and 24 h post intravenous injection presented in %ID/organ.

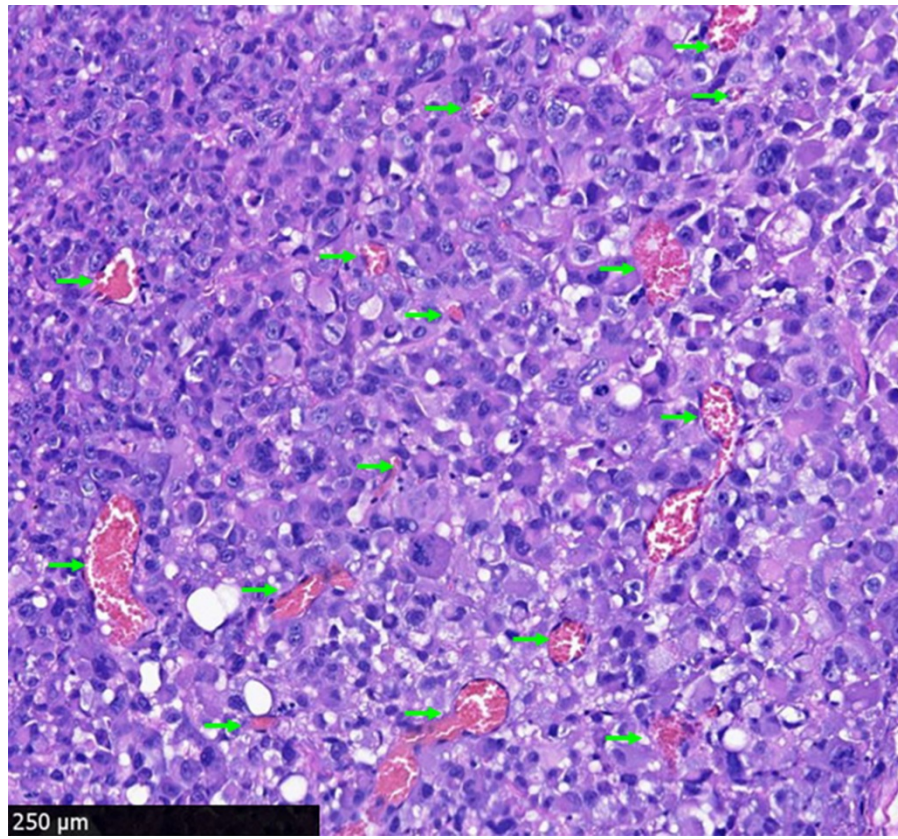

**Figure S2.** Hematoxylin and eosin staining of PC3 tumor tissue showing the active angiogenesis process (green arrow: microvessel).
